# Supplementary material
Source: PubMed Central journal article supplement (PMC3571278)
Supplement: CVI.00032-12_zcd999094662so1.pdf [file CVI.00032-12_zcd999094662so1.pdf]

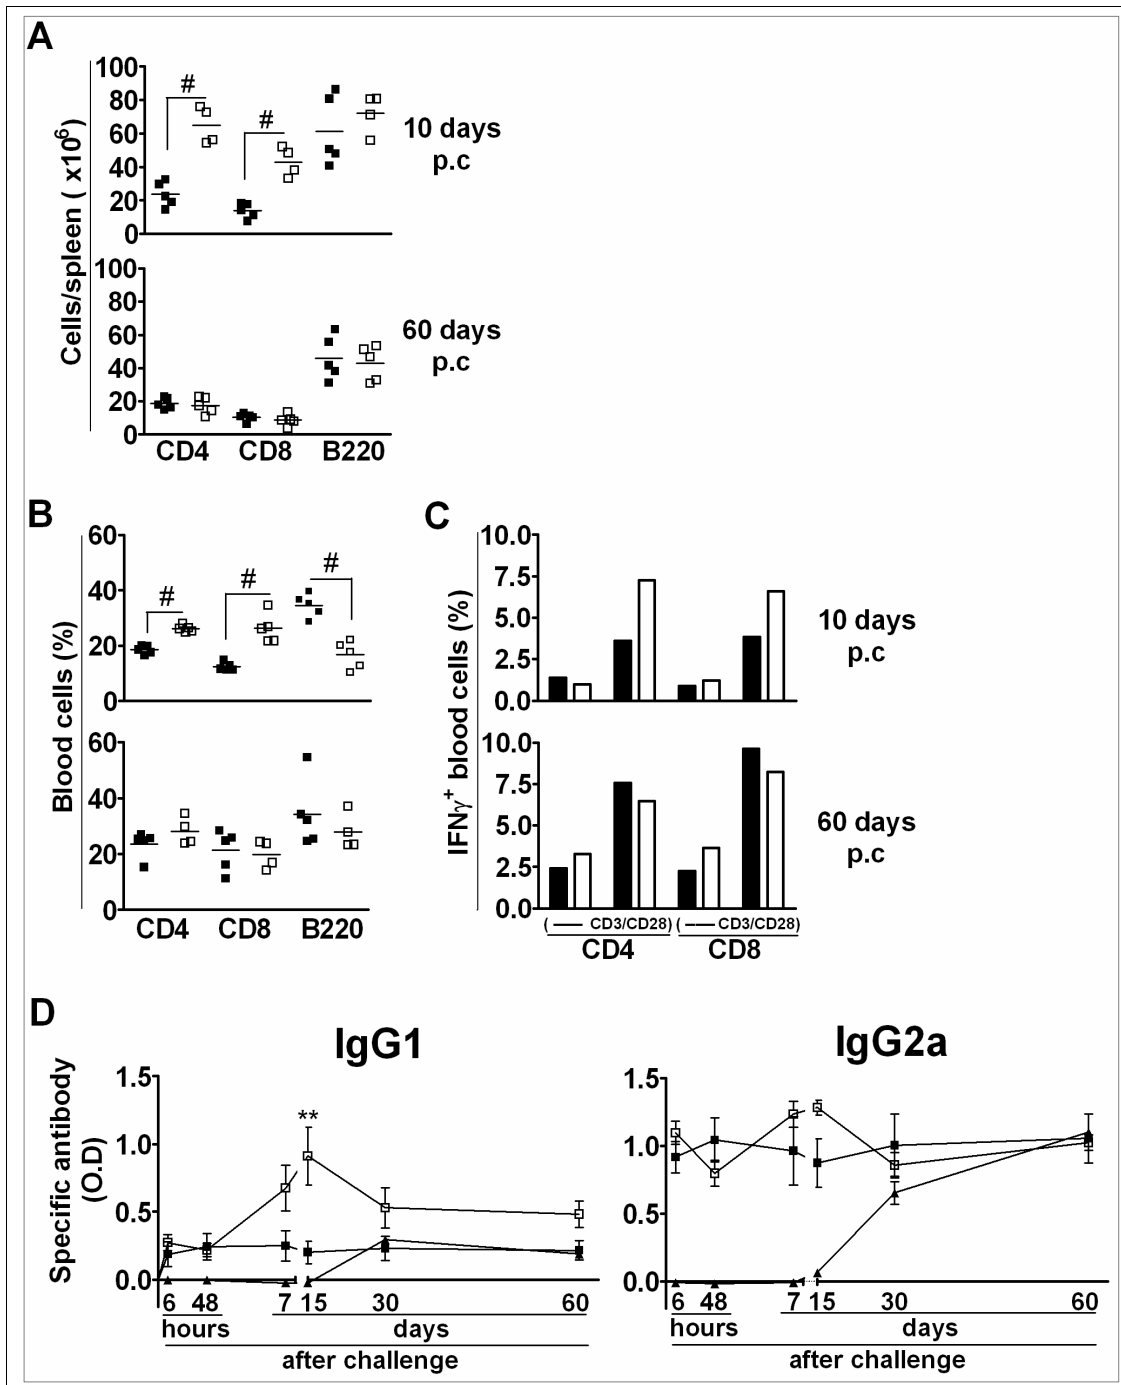

Supplementary Figure 1. Effects of challenge with a single dose of homologous *T. cruzi* parasites in the spleen and blood lymphocyte subpopulation frequencies, IFN- $\gamma$  production by blood lymphocytes and in the kinetics of *T. cruzi*-specific IgG1 and IgG2a serum antibodies of chronically infected mice. (A-C)

Spleen and blood lymphomononuclear cells from unchallenged chronically infected mice and chronically infected mice that were submitted to i.v. challenge with a single dose of homologous parasites were euthanized 10 and 60 days p.c to analyze the frequency and number of CD4<sup>+</sup>, CD8<sup>+</sup> and B (B220<sup>+</sup>) cells in the spleen (A); the frequency of CD4<sup>+</sup>, CD8<sup>+</sup> and B (B220<sup>+</sup>) cells in the blood (B) and the frequency of spontaneous and anti-CD3/CD28-induced IFN- $\gamma$ -producing CD4<sup>+</sup> and CD8<sup>+</sup> cells in the blood. D) Kinetics of anti-*T. cruzi* IgG1 and IgG2a antibody serum levels (the 1/12.000 dilution is shown) after single challenge with homologous parasites. Unchallenged chronic mice (■), challenged chronic mice (□). \* p<0.05, \*\* p<0.01, # p<0.001, compared to unchallenged chronically infected mice. Representative experiments are shown.

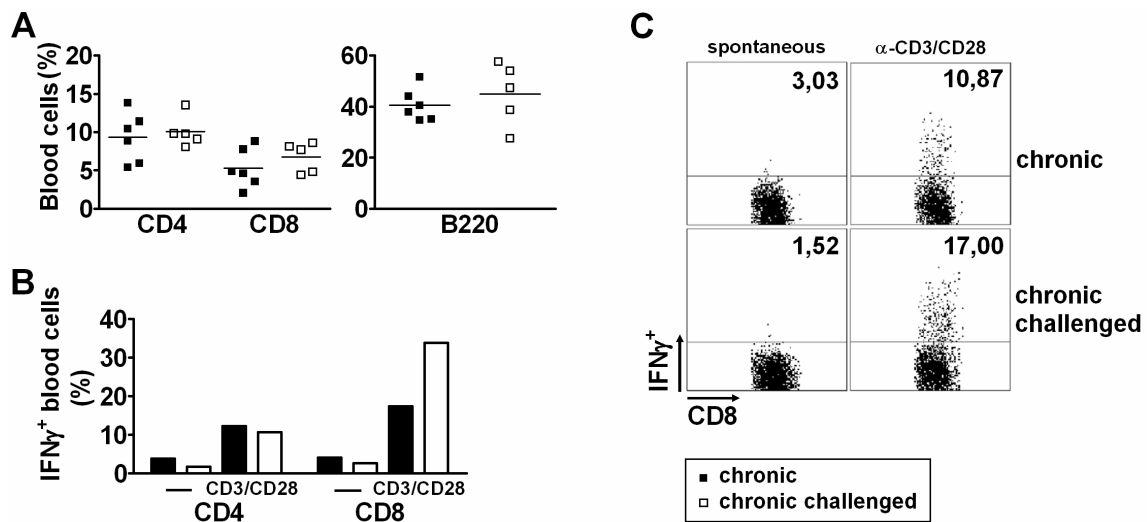

**Supplementary Figure 2. Subpopulation frequencies and IFN- $\gamma$  production among blood lymphocytes from chronically infected mice that were subjected to sustained challenge with homologous *T. cruzi* parasites.** Peripheral blood lymphomononuclear cells from unchallenged chronically infected mice and chronically infected mice that were submitted to sustained challenge with homologous *T. cruzi* parasites were analyzed 1-2 months after the last challenge dose for (A) the frequency of CD4<sup>+</sup>, CD8<sup>+</sup> and B (B220<sup>+</sup>) cells and (B) the frequency of CD4<sup>+</sup> and CD8<sup>+</sup> cells producing IFN- $\gamma$ , either spontaneously or after *in vitro* stimulation for 12 h with anti-CD3/anti-CD28 mAbs. Unchallenged (■) and challenged (□) chronic mice. (C) Representative dot blots of anti-CD3/anti-CD28 mAbs-stimulated production of IFN- $\gamma$  by CD8<sup>+</sup> blood cells from chronically infected, unchallenged and chronically infected mice that were subjected to sustained challenge with homologous parasites. Numbers in dot-blots indicate the frequency of IFN- $\gamma$ -producing cells. Representative experiment out of two experiments.
